# Supplementary material
Source: publisher figshare collection journal article supplement (https://acs.figshare.com/ndownloader/files/12659210)
Supplement: Supplementary file 1 [file 12659210]

## Supporting Informations

### **Sonochemical-Assisted *In situ* Electrochemical Synthesis of Ag/ $\alpha$ - $\text{Fe}_2\text{O}_3/\text{TiO}_2$ Nanoarrays to Harness Photoelectrochemical Energy from Water Splitting**

*Ibrahim Khan<sup>1,2</sup>, Ahsanulhaq Qurashi<sup>1,2\*</sup>*

<sup>1</sup>Center of Research Excellence in Nanotechnology King Fahd University of Petroleum and Minerals, Dhahran, Saudi Arabia

<sup>2</sup>Chemistry Department, King Fahd University of Petroleum and Minerals, Dhahran, Saudi Arabia

**Corresponding Author:** Email : [ahsanulhaq06@gmail.com](mailto:ahsanulhaq06@gmail.com); [ahsanulhaq@kfupm.edu.sa](mailto:ahsanulhaq@kfupm.edu.sa)

Tele:+96613860-7063

(Summary of Content: 9 pages, 7 figures, and 1 table)

## S1. Supplemental materials and methods

### SI-1 Characterization

Figure S1 shows the AFM images of the photoanodes. AFM images were collected under ambient conditions on a Digital Instruments Nanoscope III microscope. Etched Si nanoprobe tips (Digital Instruments, Santa Barbara, CA) were used. These tips have spring constants of approximately 0.15 N/m and are conical in shape with a cone angle of 20° and an effective radius of curvature at the tip of 10 nm. The AFM images presented here represent raw, unfiltered data collected in constant-force mode. The textural properties show variation for each sample due to deposition of Fe<sub>2</sub>O<sub>3</sub> and Ag and anodization time. The TiO<sub>2</sub> sample shows outgrowth morphology and the roughness can be clearly seen. Whereas,  $\alpha$ -Fe<sub>2</sub>O<sub>3</sub>/TiO<sub>2</sub> heterostructure shows relatively lower roughness, which can be attributed to the deposition of  $\alpha$ -Fe<sub>2</sub>O<sub>3</sub>, which partially covered the surface of titania. Additionally, the TiO<sub>2</sub> growth is inhibited by these particles as well.<sup>1,2</sup> Small bright granular spots can be observed in Figure S1(c), in the case of Ag/ $\alpha$ -Fe<sub>2</sub>O<sub>3</sub>/TiO<sub>2</sub>. These bright granular regions are the possible silver NPs distributed over the catalyst.<sup>3</sup>

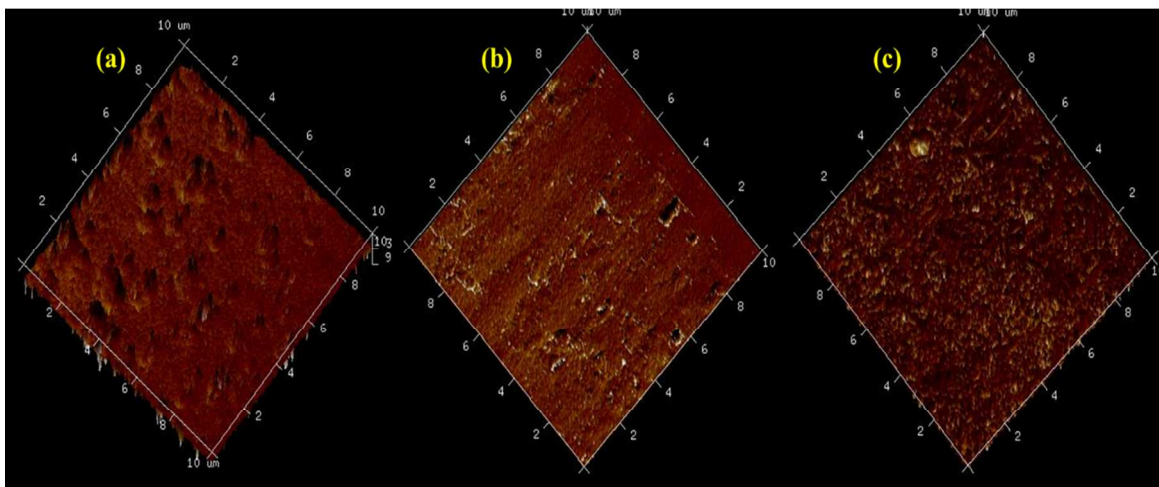

S1: Textural properties of samples via AFM (a) TiO<sub>2</sub> (b)  $\alpha$ -Fe<sub>2</sub>O<sub>3</sub>/TiO<sub>2</sub> (c) Ag/ $\alpha$ -Fe<sub>2</sub>O<sub>3</sub>/TiO<sub>2</sub>

Figure S2 represents the comparative XPS profiles of the as-synthesized samples. Figure S2(a) clearly demonstrates the appearance of Ag peaks in the survey of Ag/ $\alpha$ -Fe<sub>2</sub>O<sub>3</sub>/TiO<sub>2</sub> in the low energy region. The spectrum also showed characteristic low-intensity peaks for Fe in the higher energy regions after 700 eV. Both the regions are intentionally encircled

to identify it from the rest. The Ag peak is absent in the case of  $\alpha\text{-Fe}_2\text{O}_3/\text{TiO}_2$  and  $\text{TiO}_2$ . Another important observation is the intensity of the XPS spectra, which show great improvement in terms of intensity in case of  $\text{Ag}/\alpha\text{-Fe}_2\text{O}_3/\text{TiO}_2$  heterojunctions as compared to other samples. This phenomenon clearly demonstrated by the high-resolution spectra of Ti and O (Figure S2b and c). Additionally, there is a small shift of  $\sim 0.05\text{-}0.1\text{ eV}$  occurs towards higher binding energy in the XPS spectra of Ti and O. Which could be related to the successful heterojunction formation. Another important feature of the XPS profile in case of oxygen is the appearance of broad shoulder (encircled) after the incorporation of Fe, which is further intensified in the case of  $\text{Ag}/\alpha\text{-Fe}_2\text{O}_3/\text{TiO}_2$ . This might suggest that the incorporation of Fe ions into the crystal lattice of  $\text{TiO}_2$  influence the properties. A similar observation is reported by Abazović et al lately.

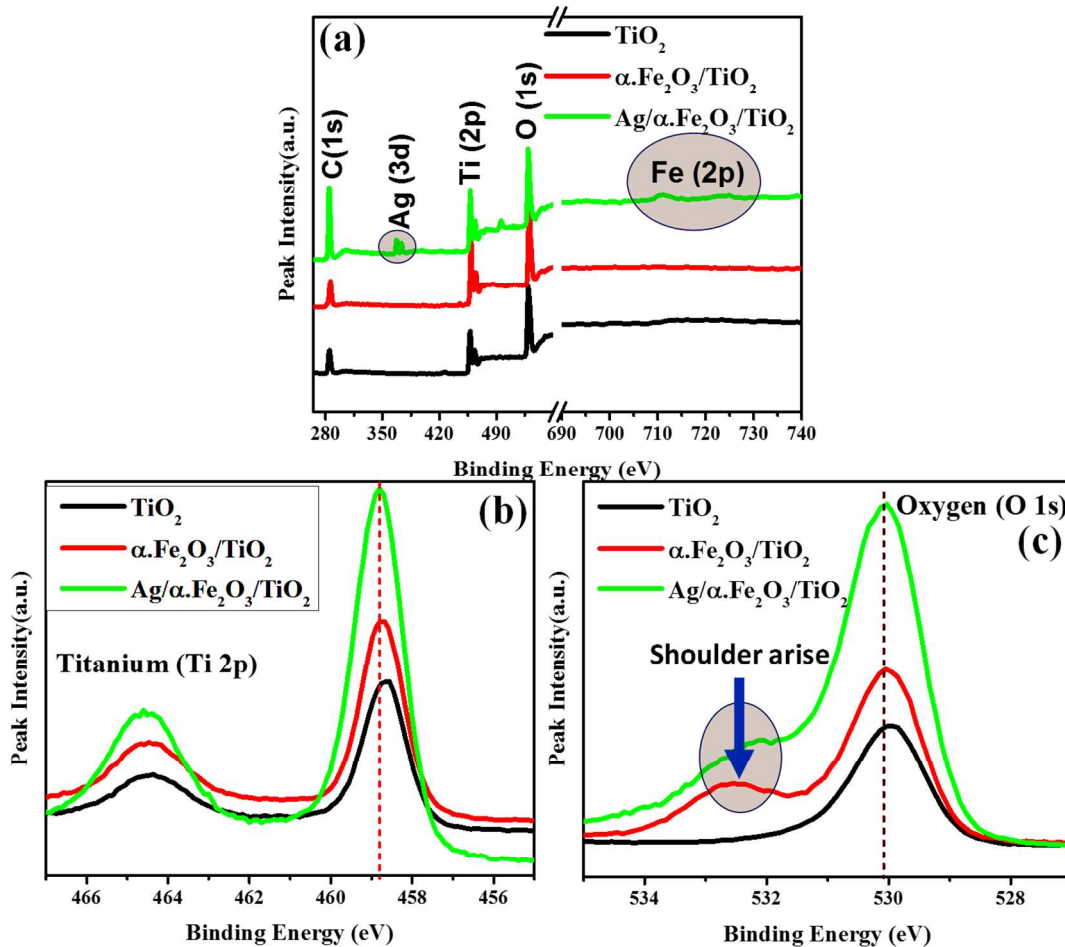

**S2:** (a) Comparative XPS profiles of  $\text{TiO}_2$ ,  $\alpha\text{-Fe}_2\text{O}_3/\text{TiO}_2$  and  $\text{Ag}/\alpha\text{-Fe}_2\text{O}_3/\text{TiO}_2$ : (a) Surveys, (b) High resolution XPS spectra of Ti (2P), and (c) O (1s).

Figure S3 showed the linear sweep voltammogram (LSV) obtained at various anodization intervals i.e. 5, 10, 20 and 30 min. It can be predicted from these results that 30 min anodization time produce sample with maximum photocurrent capacity and hence we choose 30 min anodization time for the synthesis of  $\alpha\text{-Fe}_2\text{O}_3/\text{TiO}_2$  and  $\text{Ag}/\alpha\text{-Fe}_2\text{O}_3/\text{TiO}_2$  NTAs.

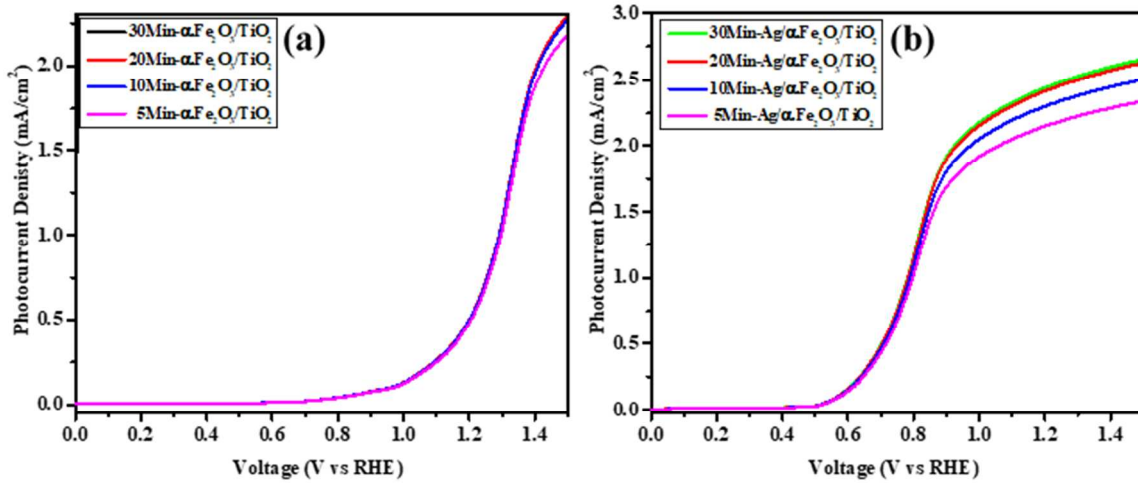

**S3:** (a)  $\alpha\text{-Fe}_2\text{O}_3$  deposition over  $\text{TiO}_2$  NTs (b) Ag NPs deposition over  $\alpha\text{-Fe}_2\text{O}_3/\text{TiO}_2$  NTAs at 5, 10, 20 and 30 Mins

The chronoamperometric ( $I-t$ ) results collected under successive light and dark cycles with  $\sim 40$  s intervals further supported the results in Figure S4. The  $I-t$  ON/OFF cycles indicated that during light chopping, the photocurrent reached a maximum value under illumination and diminished in the dark at 1.23 V.

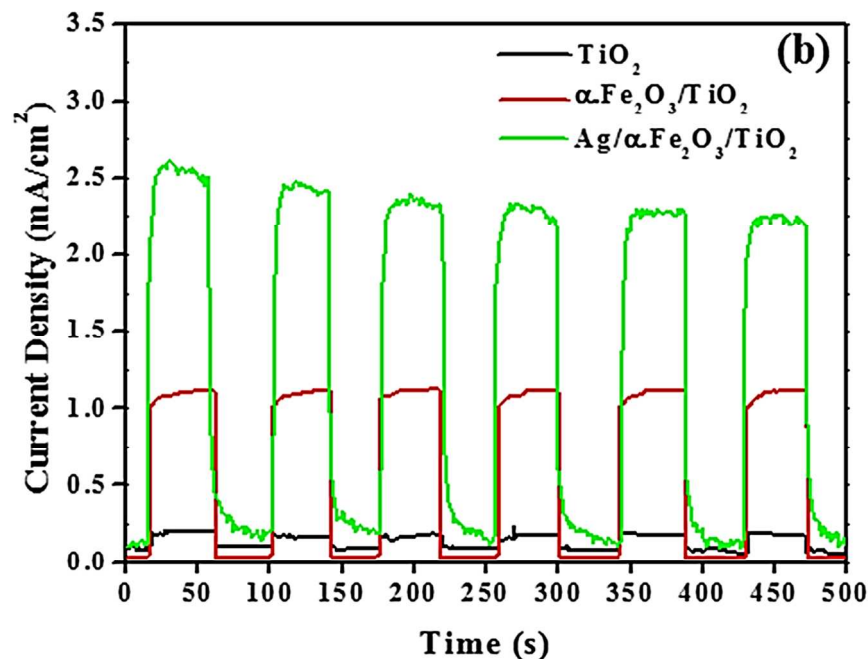

**S4:** Chopped visible light photocurrent density obtained at 40s/cycle for  $\text{TiO}_2$ ,  $\alpha\text{-Fe}_2\text{O}_3/\text{TiO}_2$  and  $\text{Ag}/\alpha\text{-Fe}_2\text{O}_3/\text{TiO}_2$  photoanodes

Figure S5 show interfacial charge and equivalent circuit from electron impedance microscopy (EIS). In the equivalent circuit,  $R_s$  shows series resistance,  $C_H$  and  $R_H$  are Helmholtz double layer capacitance and resistance and  $C_{dl}$  and  $R_{dl}$  are the capacitance and resistance in semiconductor, respectively.<sup>8</sup> As suggested by the EIS results in Figure 6(d),  $\text{Ag}/\alpha\text{-Fe}_2\text{O}_3/\text{TiO}_2$  has the smallest radii of the semicircles compared with pristine  $\text{TiO}_2$  and  $\alpha\text{-Fe}_2\text{O}_3/\text{TiO}_2$  mean the smallest resistance and charge transfer impedance. By looking to the equivalent circuit configuration, the PEC performance can be explained in terms of the total resistance value ( $R_T$ ), which is the sum of  $R_s$ ,  $R_H$ , and  $R_{dl}$ . The values obtained for  $\text{TiO}_2$ ,  $\alpha\text{-Fe}_2\text{O}_3/\text{TiO}_2$  and  $\text{Ag}/\alpha\text{-Fe}_2\text{O}_3/\text{TiO}_2$  are 232, 115 and  $65 \Omega\text{cm}^{-2}$ , respectively. These results suggested that  $\text{Ag}/\alpha\text{-Fe}_2\text{O}_3/\text{TiO}_2$  possess the lowest  $R_t$  value and therefore possess lower impedance and higher charge transfer capability.

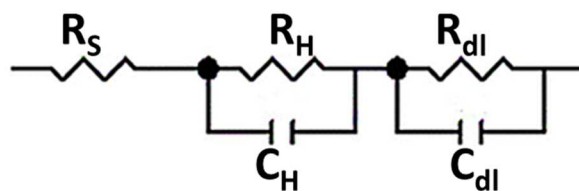

**S5:** Interfacial charge transfer equivalent electric circuit of Ag/ $\alpha$ -Fe<sub>2</sub>O<sub>3</sub>/TiO<sub>2</sub> photoanodes

The % incident photon-to-current efficiency (% IPCE) and % solar to hydrogen (% STH) values obtained at 1.23 V vs. RHE by varying the radiation wavelength from 350 to 650 nm. Figure S6 provides the summary of the % IPCE values for TiO<sub>2</sub>,  $\alpha$ -Fe<sub>2</sub>O<sub>3</sub>/TiO<sub>2</sub> and Ag/ $\alpha$ -Fe<sub>2</sub>O<sub>3</sub>/TiO<sub>2</sub> NTAs at various wavelengths. All the values are obtained under 1 SUN irradiation intensity at the incident point of the sample. The TiO<sub>2</sub> NTs show the higher %IPCE value of 17.13 in UV-Visible region < 400 nm. The uppermost %IPCE values of  $\alpha$ -Fe<sub>2</sub>O<sub>3</sub>/TiO<sub>2</sub> (26.34) and Ag/ $\alpha$ -Fe<sub>2</sub>O<sub>3</sub>/TiO<sub>2</sub> (33.84) are observed in the UV-Visible region < 400 nm, indicated that the overall efficiency of TiO<sub>2</sub> is significantly increased almost by two-folds. The trend continues in the visible region as well, where Ag/ $\alpha$ -Fe<sub>2</sub>O<sub>3</sub>/TiO<sub>2</sub> showed higher %IPCE values. These results are in excellent agreement with the available literature.<sup>9,10</sup> The results indicated that the charge recombination is overcome with the incorporation of Fe<sub>2</sub>O<sub>3</sub> and Ag, and the light absorption conversion efficiency is therefore enhanced.

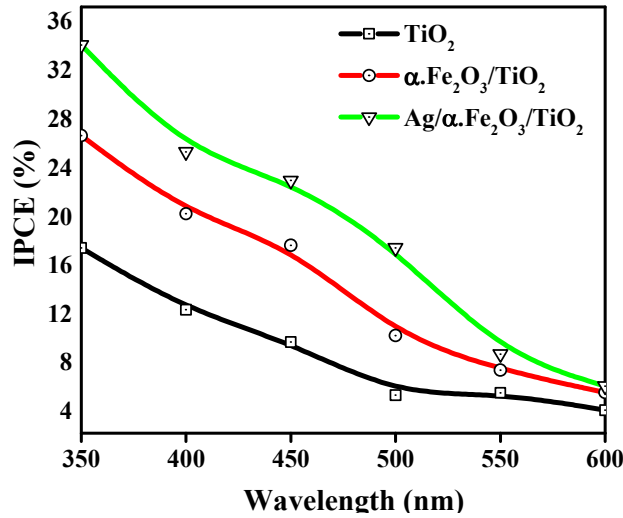

**S6:** %IPCE recorded for TiO<sub>2</sub>,  $\alpha$ -Fe<sub>2</sub>O<sub>3</sub>/TiO<sub>2</sub> and Ag/ $\alpha$ -Fe<sub>2</sub>O<sub>3</sub>/TiO<sub>2</sub> photoanodes under 1SUN irradiations

The % STH ( $\eta$ ) values are also recorded by using following equation.<sup>11–13</sup>

$$\eta = I(1.23 - V)/P_{\text{light}} \quad (\text{i})$$

Where  $I$  is the photocurrent density at the measurement applied bias,  $V$  is the applied bias (vs. RHE), and  $P_{\text{light}}$  is the incident light intensity of  $100 \text{ mW cm}^{-2}$  (AM 1.5G).

It can be observed from the table S1 that  $\text{TiO}_2$  shows higher % STH efficiency (0.94) in UV region.  $\alpha\text{-Fe}_2\text{O}_3/\text{TiO}_2$  and  $\text{Ag}/\alpha\text{-Fe}_2\text{O}_3/\text{TiO}_2$  NTAs show their highest % STH value in the visible region. Due to lower band gap and well visible light absorption capacity  $\text{Ag}/\alpha\text{-Fe}_2\text{O}_3/\text{TiO}_2$  NTAs show maximum %STH (2.46) at 500nm among the samples, which can be correlated with higher %IPCE value. The results are supported by the PEC water splitting measurements (Figure 6).

**Table S1:** % IPCE and %STH measurements at 1.23 V (vs RHE) for  $\text{TiO}_2$ ,  $\alpha\text{-Fe}_2\text{O}_3/\text{TiO}_2$ ,  $\text{Ag}/\alpha\text{-Fe}_2\text{O}_3/\text{TiO}_2$  photoanodes at various wavelengths.

| <b>Radiations</b><br><b>100 mW/cm<sup>2</sup></b> | <b>%STH</b>                      |                                                               |                                                                         |
|---------------------------------------------------|----------------------------------|---------------------------------------------------------------|-------------------------------------------------------------------------|
|                                                   | <b><math>\text{TiO}_2</math></b> | <b><math>\alpha\text{-Fe}_2\text{O}_3/\text{TiO}_2</math></b> | <b><math>\text{Ag}/\alpha\text{-Fe}_2\text{O}_3/\text{TiO}_2</math></b> |
| 350 nm                                            | 0.94                             | 0.99                                                          | 1.17                                                                    |
| 400 nm                                            | 0.77                             | 1.13                                                          | 1.62                                                                    |
| 450 nm                                            | 0.19                             | 1.16                                                          | 1.82                                                                    |
| 500 nm                                            | 0.17                             | 1.04                                                          | 2.46                                                                    |
| 600 nm                                            | 0.15                             | 0.80                                                          | 2.00                                                                    |
| 650 nm                                            | 0.17                             | 0.75                                                          | 1.30                                                                    |



## SEM Images of heterostructure after measurement

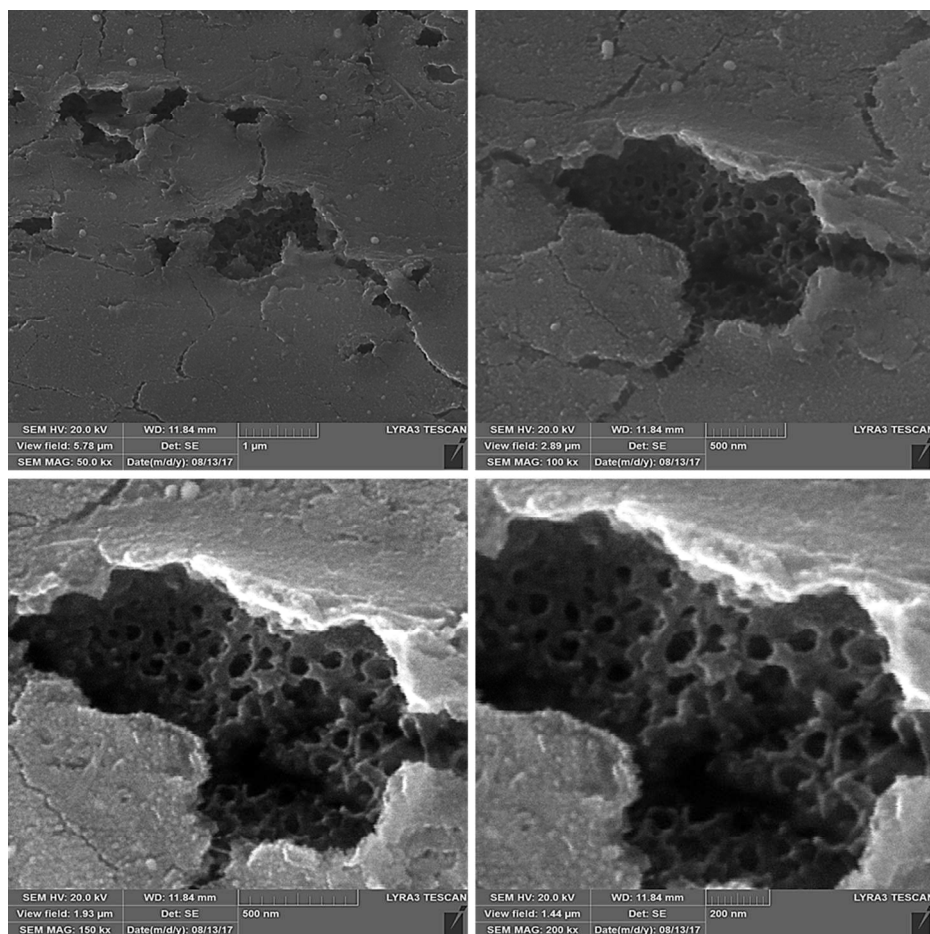

**S7:** Different resolution SEM images taken from Ag/α-Fe<sub>2</sub>O<sub>3</sub>/TiO<sub>2</sub> photoanodes after performing PEC water splitting measurements

## References:

- (1) Jiang, H.; Gao, L. Enhancing the UV inducing hydrophilicity of TiO<sub>2</sub> thin film by doping Fe ions. *Mater. Chem. Phys.* **2003**, 77 (3), 878–881.
- (2) Ismail, A. A. Synthesis and characterization of Y<sub>2</sub>O<sub>3</sub>/Fe<sub>2</sub>O<sub>3</sub>/TiO<sub>2</sub> nanoparticles by sol–gel method. *Appl. Catal. B Environ.* **2005**, 58 (1–2), 115–121.
- (3) Li, G.; Zhao, Q.; Yang, H.; Cheng, L. Antibacterial and Microstructure Properties of Titanium Surfaces Modified with Ag-Incorporated Nanotube Arrays. *Mater. Res.* **2016**, 19 (3), 735–740.
- (4) Abazović, N. D.; Mirengi, L.; Janković, I. A.; Bibić, N.; Šojić, D. V.; Abramović,



- B. F.; Čomor, M. I. Synthesis and Characterization of Rutile TiO<sub>2</sub> Nanopowders Doped with Iron Ions. *Nanoscale Res. Lett.* **2009**, *4* (6), 518–525.
- (5) Beranek, R.; Kisch, H. Tuning the optical and photoelectrochemical properties of surface-modified TiO<sub>2</sub>. *Photochem. Photobiol. Sci.* **2008**, *7* (1), 40–48.
  - (6) Hung, W.; Chien, T.; Tseng, C. Enhanced Photocatalytic Water Splitting by Plasmonic TiO<sub>2</sub>–Fe<sub>2</sub>O<sub>3</sub> Cocatalyst under Visible Light Irradiation. *J. Phys. Chem. C* **2014**, *118* (24), 12676–12681.
  - (7) Xu, R.; Li, H.; Zhang, W.; Yang, Z.; Liu, G.; Xu, Z.; Shao, H.; Qiao, G. The fabrication of In<sub>2</sub>O<sub>3</sub>/In<sub>2</sub>S<sub>3</sub>/Ag nanocubes for efficient photoelectrochemical water splitting. *Phys. Chem. Chem. Phys.* **2016**, *18* (4), 2710–2717.
  - (8) Hernández, S.; Hidalgo, D.; Sacco, A.; Chiodoni, A.; Lamberti, A.; Cauda, V.; Tresso, E.; Saracco, G. Comparison of photocatalytic and transport properties of TiO<sub>2</sub> and ZnO nanostructures for solar-driven water splitting. *Phys. Chem. Chem. Phys.* **2015**, *17* (12), 7775–7786.
  - (9) Annamalai, A.; Shinde, P. S.; Subramanian, A.; Kim, J. Y.; Kim, J. H.; Choi, S. H.; Lee, J. S.; Jang, J. S. Bifunctional TiO<sub>2</sub> underlayer for  $\alpha$ -Fe<sub>2</sub>O<sub>3</sub> nanorod based photoelectrochemical cells: enhanced interface and Ti<sup>4+</sup> doping. *J. Mater. Chem. A* **2015**, *3* (9), 5007–5013.
  - (10) Chen, S.; Zeng, Q.; Bai, J.; Li, J.; Li, L.; Xia, L.; Zhou, B. Preparation of hematite with an ultrathin iron titanate layer via an in situ reaction and its stable, long-lived, and excellent photoelectrochemical performance. *Appl. Catal. B Environ.* **2017**, *218*, 690–699.
  - (11) Vayssieres, L. *On Solar Hydrogen and Nanotechnology*; John Wiley & Sons, 2010.
  - (12) Khan, I.; Ibrahim, A. A. M.; Sohail, M.; Qurashi, A. Sonochemical assisted synthesis of RGO/ZnO nanowire arrays for photoelectrochemical water splitting. *Ultrason. Sonochem.* **2017**, *37*, 669–675.
  - (13) Su, F.; Wang, T.; Lv, R.; Zhang, J.; Zhang, P.; Lu, J.; Gong, J. Dendritic Au/TiO<sub>2</sub> nanorod arrays for visible-light driven photoelectrochemical water splitting. *Nanoscale* **2013**, *5* (19), 9001.
